# Supplementary material
Source: PubMed Central journal article supplement (PMC4651095)
Supplement: AEM.01043-15_zam999116736so1.pdf [file AEM.01043-15_zam999116736so1.pdf]

1 **SUPPLEMENTARY MATERIAL**

2 **SUPPLEMENTARY TABLES**

3 **Table S1.** Differentially expressed genes for BPG2-4 at  $P < 0.05$ . Listed are only those  
 4 genes that showed a fold-change of  $\geq 2.0$ , a Likelihood value  $\geq 0.9$  and an adjusted p-  
 5 value  $\leq 0.05$ . Genes in part verified by qRT-PCR or using promoter fusions are boxed.  
 6

| Locus_tag   | Predicted function                                           | Fold change |      |      |
|-------------|--------------------------------------------------------------|-------------|------|------|
|             |                                                              | BPG2        | BPG3 | BPG4 |
| BGL_1c00060 | catalase                                                     | 2.1-        |      |      |
| BGL_1c00150 | flagellar biosynthetic protein FliQ                          |             | 2.4+ | 2.8+ |
| BGL_1c00160 | flagellar biosynthetic protein FliP                          |             | 3.1+ | 3.6+ |
| BGL_1c00190 | flagellar motor switch protein FliM                          |             | 2.2+ | 2.7+ |
| BGL_1c00200 | flagellar basal body-associated protein FliL                 | 2.0+        | 3.4+ | 5.6+ |
| BGL_1c00490 | pterin-4-alpha-carbinolamine dehydratase                     | 2.0+        |      |      |
| BGL_1c00500 | phenylalanine-4-hydroxylase PhhA                             |             | 3.2- | 3.3- |
| BGL_1c00800 | aminotransferase class I and II                              | 2.0-        | 2.1- | 2.6- |
| BGL_1c00810 | lysine-arginine-ornithine-binding periplasmic protein ArgT   | 2.2-        | 2.8- | 4.0- |
| BGL_1c00940 | thiamine pyrophosphate enzyme domain protein TPP-binding     |             |      | 2.5- |
| BGL_1c01420 | 3-oxoacyl-(acyl carrier protein) synthase III FabH           |             | 2.8+ | 3.4+ |
| BGL_1c01430 | aminotransferase, DegT/DnrJ/EryC1/StrS family                |             | 2.1+ | 2.8+ |
| BGL_1c01440 | TPR domain protein                                           |             | 2.6+ | 3.4+ |
| BGL_1c01520 | histone-like nucleoid-structuring (H-NS) protein             | 8.7-        |      |      |
| BGL_1c01540 | flagellar transcriptional activator FliH                     |             | 2.5+ | 2.7+ |
| BGL_1c01550 | flagellar transcriptional activator FliC                     |             |      | 2.0+ |
| BGL_1c01560 | chemotaxis protein MotA                                      |             |      | 2.1+ |
| BGL_1c01700 | flagellar biosynthetic protein FliB                          |             | 3.4+ | 4.7+ |
| BGL_1c01710 | flagellar biosynthesis protein FliA                          |             | 3.1+ | 4.4+ |
| BGL_1c01720 | flagellar biosynthesis protein FliF                          |             | 2.5+ | 3.2+ |
| BGL_1c01730 | flagellar biosynthesis protein FliG                          |             |      | 2.3+ |
| BGL_1c01740 | RNA polymerase, sigma factor FliA                            |             | 2.2+ | 2.9+ |
| BGL_1c01870 | hypothetical protein                                         |             |      | 2.3- |
| BGL_1c01890 | rare lipoprotein A                                           | 3.4+        |      |      |
| BGL_1c02030 | hypothetical protein                                         |             | 3.2+ | 2.7+ |
| BGL_1c02100 | hypothetical protein                                         |             | 2.1+ |      |
| BGL_1c02640 | ribosomal protein L14                                        |             |      | 3.1+ |
| BGL_1c03130 | thiamine-phosphate diphosphorylase                           | 2.0-        |      | 2.5- |
| BGL_1c03410 | ubiquinol-cytochrome c reductase, iron-sulphur subunit       | 2.3-        |      |      |
| BGL_1c03420 | cytochrome b                                                 | 2.8-        |      |      |
| BGL_1c03540 | type VI secretion system inner membrane protein, DotU family | 2.1-        |      |      |
| BGL_1c03550 | type VI secretion system protein, VC_A0114 family            | 2.2-        |      |      |
| BGL_1c03560 | type VI secretion system, lipoprotein VCA0113 family         | 2.4-        |      |      |
| BGL_1c03570 | TPR domain protein                                           | 3.1-        |      |      |
| BGL_1c03580 | type VI secretion system protein, VC_A0107 family            | 3.1-        |      |      |

| Locus_tag   | Predicted function                                                 | Fold change |       |       |
|-------------|--------------------------------------------------------------------|-------------|-------|-------|
|             |                                                                    | BGPG2       | BGPG3 | BGPG4 |
| BGL_1c03590 | type VI secretion protein, EvpB/VC_A0108 family                    | 3.1-        |       |       |
| BGL_1c03600 | type VI secretion system effector, Hcp family                      | 3.1-        |       |       |
| BGL_1c03610 | type VI secretion system lysozyme-like protein HsiF                | 2.4-        |       |       |
| BGL_1c03620 | type VI secretion system protein, VC_A0110 family                  | 2.5-        |       |       |
| BGL_1c03630 | type VI secretion system protein, VC_A0111 family                  | 2.4-        |       |       |
| BGL_1c03640 | type VI secretion system ATPase, ClpV1 family                      | 2.6-        |       |       |
| BGL_1c03650 | type VI secretion-associated protein, ImpA family                  | 2.3-        |       |       |
| BGL_1c03700 | hypothetical protein                                               | 2.5-        |       |       |
| BGL_1c03750 | hypothetical protein                                               | 2.2-        |       |       |
| BGL_1c04130 | hypothetical protein                                               | 2.7-        |       |       |
| BGL_1c04140 | glutathione S-transferase                                          | 2.9-        |       |       |
| BGL_1c04160 | aspartate aminotransferase AspB                                    | 4.4-        |       |       |
| BGL_1c04170 | hypothetical protein                                               | 4.2-        |       |       |
| BGL_1c04180 | transcriptional regulator, LysR family                             | 3.6-        |       |       |
| BGL_1c04230 | anthranilate synthase component 1 TrpE                             |             |       | 2.5-  |
| BGL_1c04720 | ribosomal protein L27                                              |             |       | 2.5+  |
| BGL_1c06060 | putative flavohemo protein Hmp                                     | 3.2-        |       |       |
| BGL_1c06190 | chaperone DnaK                                                     |             |       | 2.1-  |
| BGL_1c06220 | 3-methyl-2-oxobutanoate hydroxymethyltransferase PanB              |             |       | 2.2-  |
| BGL_1c06430 | capsular polysaccharide export inner-membrane protein WcbD         |             | 2.2+  | 2.4+  |
| BGL_1c06790 | Protein of unknown function (DUF3318)                              |             |       | 2.2-  |
| BGL_1c06830 | acyl-CoA dehydrogenase                                             |             |       | 2.1-  |
| BGL_1c06860 | 4-hydroxybenzoate transporter PcaK                                 | 2.9+        |       |       |
| BGL_1c06890 | cob(II)yrinic acid a,c-diamide reductase BluB                      | 2.3-        |       |       |
| BGL_1c06900 | transcriptional regulator, LysR family                             | 14.0-       |       |       |
| BGL_1c07040 | hypothetical protein                                               | 42.2-       |       | 4.9-  |
| BGL_1c07150 | rubredoxin RubA                                                    |             | 2.0+  | 2.5+  |
| BGL_1c07210 | dihydroorotase-like protein PyrC                                   |             |       | 2.1-  |
| BGL_1c07690 | integrase                                                          |             | 2.9+  | 2.8+  |
| BGL_1c07900 | transcriptional regulator, LysR family                             |             |       | 13.0+ |
| BGL_1c07910 | <i>N</i> -acylhomoserine lactone synthase BpsI                     | 2.9-        |       | 3.0+  |
| BGL_1c07920 | hypothetical protein                                               |             |       | 4.8+  |
| BGL_1c07930 | UspA domain protein                                                |             |       | 6.0+  |
| BGL_1c07940 | transcriptional regulator, LysR family                             |             |       | 2.1+  |
| BGL_1c07950 | major facilitator superfamily MFS-1 transporter                    |             |       | 2.4+  |
| BGL_1c07980 | autoinducer-binding transcriptional regulator, LuxR family protein | 2.4-        |       |       |
| BGL_1c08000 | thioesterase superfamily protein                                   | 2.1-        |       |       |
| BGL_1c08010 | acyl-CoA dehydrogenase                                             | 2.5-        |       |       |
| BGL_1c08110 | hypothetical protein                                               | 2.7-        |       | 2.4-  |
| BGL_1c08430 | hypothetical protein                                               |             | 29.8+ | 33.4+ |
| BGL_1c08470 | resolvase                                                          | 2.1+        |       |       |
| BGL_1c08480 | hypothetical protein                                               |             | 2.2+  | 2.2+  |
| BGL_1c08690 | porin Gram-negative type                                           | 2.3-        |       |       |
| BGL_1c08700 | hypothetical protein                                               | 2.7-        |       |       |
| BGL_1c08710 | cold-shock DNA-binding domain protein                              | 10.1-       | 2.2+  | 2.5+  |

| Locus_tag   | Predicted function                                        | Fold change |       |       |
|-------------|-----------------------------------------------------------|-------------|-------|-------|
|             |                                                           | BGPG2       | BGPG3 | BGPG4 |
| BGL_1c08720 | DNA polymerase III, epsilon subunit                       | 2.7-        |       |       |
| BGL_1c08750 | transglycosylase-like protein                             | 2.1-        |       |       |
| BGL_1c08830 | xanthine dehydrogenase accessory protein XdhC             |             |       | 2.3-  |
| BGL_1c08900 | monooxygenase, FAD-binding                                |             |       | 2.2-  |
| BGL_1c08930 | formate dehydrogenase, beta subunit                       |             |       | 2.0-  |
| BGL_1c08990 | biodegradative arginine decarboxylase AdiA                | 8.9+        |       |       |
| BGL_1c09000 | arginine/agmatine antiporter AdiC                         | 23.5+       |       |       |
| BGL_1c09070 | hypothetical protein                                      |             | 7.2+  | 9.9+  |
| BGL_1c09860 | ribosomal protein L32                                     |             | 2.1+  | 2.9+  |
| BGL_1c11560 | major facilitator superfamily MFS-1 transporter           |             |       | 2.5+  |
| BGL_1c11780 | para-aminobenzoate synthase PabB                          |             |       | 2.1-  |
| BGL_1c11970 | HAD-superfamily hydrolase, subfamily IA, variant3         | 3.9+        |       |       |
| BGL_1c11980 | major facilitator superfamily MFS-1 transporter           |             |       | 2.9+  |
| BGL_1c12010 | heat shock protein Hsp20                                  |             | 2.3-  | 3.4-  |
| BGL_1c12020 | heat shock protein Hsp20                                  |             | 2.7-  | 4.3-  |
| BGL_1c12030 | phosphoenolpyruvate carboxykinase                         | 2.2+        | 2.1-  | 3.9-  |
| BGL_1c12090 | acetyl-CoA carboxylase beta subunit-like protein          |             |       | 2.7-  |
| BGL_1c12100 | malonate decarboxylase, gamma subunit MdcE                |             |       | 2.5-  |
| BGL_1c12110 | phosphoribosyl-dephospho-CoA transferase MdcG             |             |       | 3.0-  |
| BGL_1c12630 | MltA-interacting protein MipA family                      | 2.2-        |       |       |
| BGL_1c12860 | putative acyl-carrier-protein                             |             |       | 2.1+  |
| BGL_1c13180 | hypothetical protein                                      |             | 3.2+  | 3.0+  |
| BGL_1c13200 | Rhs family protein                                        | 2.1-        |       |       |
| BGL_1c13390 | type VI secretion system protein, Vgr family protein VgrG |             |       | 2.1-  |
| BGL_1c14040 | sensor kinase protein RcsC                                | 5.3+        |       |       |
| BGL_1c14340 | transcriptional regulator, GntR family                    | 2.2-        |       |       |
| BGL_1c14350 | sodium:dicarboxylate symporter                            | 2.4-        |       |       |
| BGL_1c14370 | hypothetical protein                                      | 2.0-        |       |       |
| BGL_1c14410 | hypothetical protein                                      | 2.2-        | 9.1+  | 2.5-  |
| BGL_1c14460 | hypothetical protein                                      | 4.0+        |       |       |
| BGL_1c14470 | transcriptional regulatory protein CusR                   | 3.6+        |       |       |
| BGL_1c14490 | 4-hydroxyphenylpyruvate dioxygenase                       | 2.1+        |       |       |
| BGL_1c14710 | putative mutator mutT protein                             | 30.3-       | 2.7+  | 2.5+  |
| BGL_1c14720 | succinylglutamate desuccinylase/aspartoacylase            | 2.1-        |       |       |
| BGL_1c14740 | beta-lactamase                                            | 2.1-        |       |       |
| BGL_1c14840 | hypothetical protein                                      |             | 2.1+  |       |
| BGL_1c14870 | Rhs element Vgr protein                                   | 2.2-        |       |       |
| BGL_1c14880 | Rhs family protein                                        | 2.3-        |       |       |
| BGL_1c14890 | hypothetical protein                                      |             | 2.0+  | 2.1+  |
| BGL_1c14900 | Immunity protein Imm1                                     | 2.0-        |       |       |
| BGL_1c15220 | 5-deoxy-glucuronate isomerase lolB                        | 2.7+        |       |       |
| BGL_1c15230 | putative amine catabolism-like protein                    | 2.8+        |       |       |
| BGL_1c15240 | 3D-(3,5/4)-trihydroxycyclohexane-1,2-dione hydrolase lolD | 3.1+        |       |       |
| BGL_1c15250 | 5-dehydro-2-deoxygluconokinase lolC                       | 3.4+        |       |       |
| BGL_1c15260 | sugar ABC transporter, ATP-binding protein                | 3.1+        |       |       |

| Locus_tag   | Predicted function                                       | Fold change |       |       |
|-------------|----------------------------------------------------------|-------------|-------|-------|
|             |                                                          | BGPG2       | BGPG3 | BGPG4 |
| BGL_1c15270 | sugar ABC transporter, permease protein                  | 3.9+        |       |       |
| BGL_1c15280 | sugar ABC transporter, periplasmic sugar-binding protein | 5.7+        | 2.8+  |       |
| BGL_1c15290 | SIS domain protein                                       | 2.9+        | 2.2+  | 2.4+  |
| BGL_1c15300 | inositol 2-dehydrogenase IdhA                            | 2.2+        |       |       |
| BGL_1c15710 | 50S ribosomal protein L35                                |             |       | 3.1+  |
| BGL_1c15810 | L-sulfolactate dehydrogenase ComC                        |             |       | 2.0-  |
| BGL_1c15950 | hypothetical protein                                     |             |       | 3.3+  |
| BGL_1c16020 | hypothetical protein                                     | 2.1+        |       |       |
| BGL_1c16240 | putative exported heme utilisation-like protein          | 6.9-        |       |       |
| BGL_1c16250 | hypothetical protein                                     | 130.1-      |       | 3.0-  |
| BGL_1c16260 | hypothetical protein                                     | 274.1-      |       | 3.0-  |
| BGL_1c16270 | Flp/Fap pilin component                                  | 7.1-        | 2.4+  | 2.1+  |
| BGL_1c16280 | peptidase A24A, prepilin type IV                         | 12.0-       |       |       |
| BGL_1c16290 | TadE-like protein                                        | 11.1-       |       |       |
| BGL_1c16300 | flp pilus assembly CpaB                                  | 10.2-       |       |       |
| BGL_1c16310 | putative Flp pilus assembly protein secretin CpaC        | 9.5-        |       |       |
| BGL_1c16320 | putative pilus assembly protein, CpaE-like protein       | 10.9-       |       |       |
| BGL_1c16330 | putative Flp pilus assembly protein ATPase CpaF          | 12.4-       |       |       |
| BGL_1c16340 | flp pilus assembly protein TadB                          | 10.8-       |       |       |
| BGL_1c16350 | flp pilus assembly protein TadC                          | 11.3-       |       |       |
| BGL_1c16360 | flp pilus assembly protein TadD                          | 10.5-       |       |       |
| BGL_1c16370 | hypothetical protein                                     | 10.6-       |       |       |
| BGL_1c16380 | sigma 54 specific transcriptional regulator, Fis family  | 7.4-        |       |       |
| BGL_1c16420 | AMP-dependent synthase and ligase                        |             |       | 4.0-  |
| BGL_1c17000 | death-on-curing family protein                           | 3.0+        | 2.9+  | 2.9+  |
| BGL_1c17290 | hypothetical protein                                     | 2.6-        |       |       |
| BGL_1c17300 | nucleoside 2-deoxyribosyltransferase                     | 2.1-        |       |       |
| BGL_1c17730 | hypothetical protein                                     | 2.3+        |       |       |
| BGL_1c17810 | putative bacteriophage protein                           | 2.6-        | 6.8-  | 6.6-  |
| BGL_1c17820 | hypothetical protein                                     | 3.2-        | 8.4-  | 8.3-  |
| BGL_1c17830 | putative bacteriophage protein                           | 2.0-        | 3.8-  | 3.3-  |
| BGL_1c17840 | putative bacteriophage protein                           | 2.8-        | 4.4-  | 4.9-  |
| BGL_1c17860 | phage-like tail protein                                  |             | 2.0-  | 2.2-  |
| BGL_1c17870 | hypothetical protein                                     |             | 2.1-  | 2.6-  |
| BGL_1c17890 | hypothetical protein                                     |             | 2.0-  | 2.5-  |
| BGL_1c17900 | putative bacteriophage protein                           |             | 3.0-  | 3.1-  |
| BGL_1c17920 | putative phage baseplate assembly protein                |             | 2.3-  | 2.9-  |
| BGL_1c17940 | hypothetical protein                                     |             | 2.0-  |       |
| BGL_1c17990 | lysozym                                                  | 9.0-        | 9.0-  | 5.3-  |
| BGL_1c18200 | ABC-type sugar transport system, ATPase component        |             | 2.2-  | 2.8-  |
| BGL_1c18220 | transcriptional regulator, LacI family                   |             |       | 2.0-  |
| BGL_1c18230 | ribokinase                                               |             |       | 2.2-  |
| BGL_1c18240 | protein kinase                                           |             |       | 2.8-  |
| BGL_1c18600 | methyl-accepting chemotaxis protein                      | 4.0-        |       |       |
| BGL_1c18610 | hypothetical protein                                     |             | 3.3+  | 2.5+  |

| Locus_tag   | Predicted function                                                                 | Fold change |       |       |
|-------------|------------------------------------------------------------------------------------|-------------|-------|-------|
|             |                                                                                    | BGPG2       | BGPG3 | BGPG4 |
| BGL_1c18690 | hypothetical protein                                                               |             | 7.7+  | 8.4+  |
| BGL_1c18740 | hypothetical protein                                                               |             |       | 2.3+  |
| BGL_1c18770 | hypothetical protein                                                               | 2.4-        |       |       |
| BGL_1c18780 | hypothetical protein                                                               | 2.4-        |       |       |
| BGL_1c18810 | CRISPR-associated protein Cas1                                                     | 2.2-        |       |       |
| BGL_1c18820 | CRISPR-associated helicase Cas3, Yersinia-type                                     | 3.1-        |       |       |
| BGL_1c18830 | CRISPR-associated protein, Csy1 family                                             | 8.3-        | 3.3-  | 4.2-  |
| BGL_1c18840 | CRISPR-associated protein, Csy2 family                                             | 9.5-        | 3.9-  | 5.5-  |
| BGL_1c18850 | CRISPR-associated protein, Csy3 family                                             | 7.5-        | 3.1-  | 3.7-  |
| BGL_1c18860 | CRISPR-associated protein, Csy4 family                                             | 6.7-        | 2.7-  | 3.1-  |
| BGL_1c18870 | hypothetical protein                                                               | 3.2-        |       |       |
| BGL_1c19000 | non-ribosomal peptide synthase                                                     | 2.4-        |       |       |
| BGL_1c19170 | hypothetical protein                                                               |             | 2.8+  | 3.0+  |
| BGL_1c19330 | hypothetical protein                                                               | 2.4-        |       |       |
| BGL_1c19370 | phosphocarrier HPr protein                                                         | 2.6+        |       |       |
| BGL_1c19520 | major facilitator superfamily MFS-1 transporter                                    | 2.4+        |       |       |
| BGL_1c19540 | putative gluconolactonase                                                          |             |       | 2.2-  |
| BGL_1c19770 | hypothetical protein                                                               | 175.0-      |       |       |
| BGL_1c19850 | lactate utilization protein A                                                      |             | 2.5-  | 2.2-  |
| BGL_1c19900 | hypothetical protein                                                               |             |       | 2.5-  |
| BGL_1c19910 | short chain dehydrogenase                                                          |             |       | 2.2-  |
| BGL_1c19920 | mandelate racemase                                                                 | 2.0+        |       |       |
| BGL_1c19940 | peptidase, M1 family protein                                                       | 6.3-        |       |       |
| BGL_1c20290 | hypothetical protein                                                               | 2.7-        |       |       |
| BGL_1c20300 | putative esterase                                                                  | 3.9-        |       |       |
| BGL_1c20310 | beta-ketoacyl synthase                                                             | 2.6-        |       |       |
| BGL_1c20330 | hypothetical protein                                                               | 2.7-        |       |       |
| BGL_1c20340 | major facilitator superfamily MFS-1 transporter                                    | 2.6-        |       |       |
| BGL_1c20350 | 4Fe-4S ferredoxin, iron-sulfur binding domain protein FdxA                         | 2.8-        |       |       |
| BGL_1c20360 | hypothetical protein                                                               | 2.8-        |       |       |
| BGL_1c20370 | putative GCN5-like N-acetyltransferase                                             | 3.3-        |       |       |
| BGL_1c20380 | hypothetical protein                                                               | 3.1-        |       |       |
| BGL_1c20390 | AMP-dependent synthase and ligase                                                  | 3.3-        |       |       |
| BGL_1c20400 | hypothetical protein                                                               | 2.8-        |       |       |
| BGL_1c20530 | TonB-dependent Fe(III)-pyochelinreceptor                                           | 2.0-        |       |       |
| BGL_1c20760 | serine metalloprotease                                                             | 17.5-       |       |       |
| BGL_1c20770 | Fungal chitosanase of glycosyl hydrolase group 75                                  | 2.1-        |       |       |
| BGL_1c20950 | metallophosphoesterase                                                             |             |       | 2.4-  |
| BGL_1c20970 | hypothetical protein                                                               |             | 2.1+  | 2.1+  |
| BGL_1c21030 | YbaK/prolyl-tRNA synthase associated region                                        | 2.2-        |       |       |
| BGL_1c21040 | linear gramicidin synthase subunit C                                               | 2.9-        |       |       |
| BGL_1c21050 | linear gramicidin dehydrogenase LgrE                                               | 2.4-        |       |       |
| BGL_1c21060 | hypothetical protein, acyl carrier protein-like, phosphopantetheine binding domain | 2.5-        |       |       |
| BGL_1c21070 | protein CmaB                                                                       | 5.3-        |       |       |
| BGL_1c21090 | putative periplasmic substrate-binding protein                                     |             |       | 2.1-  |

| Locus_tag   | Predicted function                                                               | Fold change |       |       |
|-------------|----------------------------------------------------------------------------------|-------------|-------|-------|
|             |                                                                                  | BGPG2       | BGPG3 | BGPG4 |
| BGL_1c21170 | hypothetical protein                                                             | 3.2+        |       |       |
| BGL_1c21180 | hypothetical protein                                                             | 3.3+        |       |       |
| BGL_1c21240 | hypothetical protein                                                             | 5.5-        |       |       |
| BGL_1c21470 | 2-dehydro-3-deoxygluconokinase KdgK                                              |             |       | 2.1-  |
| BGL_1c21750 | cystathionine beta-lyase MetC                                                    |             |       | 2.5-  |
| BGL_1c22090 | phosphatidylserine decarboxylase-like protein                                    | 2.5-        |       |       |
| BGL_1c22110 | hypothetical protein                                                             | 17.6-       |       |       |
| BGL_1c22350 | small nuclear ribonucleo protein (Sm protein)                                    |             | 2.1+  | 2.3+  |
| BGL_1c22680 | acetoin catabolism regulatory protein AcoR                                       |             |       | 2.3-  |
| BGL_1c22710 | ATP-dependent Clp protease, ATP-binding subunit ClpB                             |             |       | 2.2-  |
| BGL_1c23260 | hypothetical protein                                                             |             |       | 2.2-  |
| BGL_1c23490 | putative class-V aminotransferase                                                |             |       | 2.3-  |
| BGL_1c23590 | transport-associated protein                                                     | 3.0-        |       |       |
| BGL_1c23640 | ABC sugar transporter, ATPase protein                                            |             |       | 2.1-  |
| BGL_1c23700 | sensor histidine kinase                                                          |             |       | 2.6-  |
| BGL_1c23840 | alkyl hydroperoxide reductase AhpC                                               |             |       | 2.1-  |
| BGL_1c23870 | acetylornithine deacetylase ArgE                                                 |             |       | 2.0-  |
| BGL_1c24010 | ureidoglycolate hydrolase                                                        |             |       | 2.5-  |
| BGL_1c24090 | CMP/dCMP deaminase, zinc-binding                                                 | 12.5+       |       |       |
| BGL_1c24100 | hypothetical protein                                                             | 9.5+        |       |       |
| BGL_1c24220 | hypothetical protein                                                             |             | 5.0+  | 3.7+  |
| BGL_1c24870 | acyl-CoA-binding protein                                                         |             | 2.2+  | 2.0+  |
| BGL_1c24880 | DEAD/DEAH box helicase-like protein                                              | 3.3+        |       | 2.2+  |
| BGL_1c24890 | isocitrate lyase AceA                                                            |             |       | 2.0-  |
| BGL_1c25050 | anaerobic dehydrogenase                                                          |             |       | 2.5-  |
| BGL_1c25200 | hypothetical protein                                                             | 6.4-        |       |       |
| BGL_1c25310 | ABC-type polar amino acid transport system periplasmic substrate-binding protein |             |       | 2.6+  |
| BGL_1c26330 | phasin-like protein                                                              | 2.5-        |       | 2.1+  |
| BGL_1c26400 | oligopeptidase A                                                                 |             |       | 2.1-  |
| BGL_1c26420 | putative transmembrane efflux protein                                            | 4.7-        |       |       |
| BGL_1c26430 | argininosuccinate synthase ArgG                                                  | 10.2-       |       |       |
| BGL_1c26440 | putative non-ribosomal peptide synthase, acetyl-CoA ligase-like protein          | 8.1-        |       |       |
| BGL_1c26450 | aldo/keto reductase                                                              | 7.0-        |       |       |
| BGL_1c26460 | adenylylsulfate kinase                                                           | 5.7-        |       |       |
| BGL_1c26500 | oxidoreductase, molybdopterin binding                                            |             | 7.6+  | 3.1-  |
| BGL_1c26510 | putative transmembrane hydrogenase cytochrome b-type subunit                     |             | 18.0+ | 3.0-  |
| BGL_1c26710 | putative lipoprotein                                                             |             |       | 2.1-  |
| BGL_1c26720 | aminotransferase, class III                                                      | 3.2-        |       |       |
| BGL_1c26730 | gamma-glutamylputrescine synthase PuuA                                           | 2.7-        |       |       |
| BGL_1c26740 | gamma-glutamyl-gamma-aminobutyrate hydrolase PuuD                                | 3.0-        |       |       |
| BGL_1c26750 | hypothetical protein                                                             | 2.0-        |       |       |
| BGL_1c26770 | gamma-glutamyl-gamma-aminobutyraldehyde dehydrogenase PuuC                       |             |       | 2.0-  |
| BGL_1c26780 | protein HutG                                                                     | 2.1+        |       |       |
| BGL_1c26790 | formimidoylglutamate deiminase HutF                                              | 2.7+        |       |       |

| Locus_tag   | Predicted function                                                       | Fold change |       |       |
|-------------|--------------------------------------------------------------------------|-------------|-------|-------|
|             |                                                                          | BGPG2       | BGPG3 | BGPG4 |
| BGL_1c26810 | putative acyl-CoA dehydrogenase HutD                                     |             | 2.0-  |       |
| BGL_1c26830 | histidine utilization repressor HutC                                     | 3.6+        |       |       |
| BGL_1c26840 | histidine ammonia-lyase HutH                                             | 3.1+        |       |       |
| BGL_1c26970 | putative plasmid recombination enzyme                                    |             | 10.5+ | 8.5+  |
| BGL_1c27180 | bacterioferritin-associated ferredoxin                                   |             |       | 2.3+  |
| BGL_1c27300 | hypothetical protein                                                     |             |       | 2.9+  |
| BGL_1c27570 | acyl-CoA dehydrogenase                                                   |             |       | 2.2-  |
| BGL_1c27800 | 30S ribosomal protein S15                                                |             |       | 2.6+  |
| BGL_1c27820 | carbonate dehydratase                                                    | 6.9-        |       |       |
| BGL_1c27830 | sulphate transporter                                                     | 9.5-        |       |       |
| BGL_1c27880 | hypothetical protein                                                     |             | 2.7+  | 4.7+  |
| BGL_1c28240 | hypothetical protein                                                     | 2.0-        |       |       |
| BGL_1c28280 | hypothetical protein                                                     | 2.0-        |       | 2.0-  |
| BGL_1c28530 | hypothetical protein                                                     | 2.1-        | 5.7+  | 5.7+  |
| BGL_1c28560 | cytochrome c family protein                                              | 2.3-        |       |       |
| BGL_1c28570 | cytochrome c553                                                          | 2.3-        |       |       |
| BGL_1c28660 | G/U mismatch-specific uracil-DNA glycosylase (EC 3.2.2.-)                |             |       | 2.3-  |
| BGL_1c28670 | chorismate lyase (EC 4.1.3.40)                                           |             |       | 2.3-  |
| BGL_1c28680 | molecular chaperone, HSP90 family protein                                |             |       | 2.2-  |
| BGL_1c28810 | Domain of unknown function (DUF4399)                                     | 2.2-        |       |       |
| BGL_1c28970 | hypothetical protein                                                     |             | 2.5+  | 2.5+  |
| BGL_1c28980 | hypothetical protein                                                     | 2.1-        |       |       |
| BGL_1c28990 | hypothetical protein                                                     |             | 2.2+  | 2.1+  |
| BGL_1c29070 | hypothetical protein                                                     |             |       | 2.5-  |
| BGL_1c29080 | hypothetical protein                                                     |             |       | 2.1+  |
| BGL_1c29170 | hypothetical protein                                                     |             |       | 3.1-  |
| BGL_1c29180 | alpha,alpha-trehalose-phosphate synthase OtsA                            |             |       | 2.7-  |
| BGL_1c29250 | hypothetical protein                                                     |             | 2.9+  | 3.0+  |
| BGL_1c29560 | surface antigen (D15)                                                    | 2.0-        |       |       |
| BGL_1c29970 | hypothetical protein                                                     |             | 2.2+  | 2.3+  |
| BGL_1c30010 | acetyltransferase, GNAT family                                           |             |       | 2.0-  |
| BGL_1c30020 | ABC transporter-like protein                                             | 3.1+        |       |       |
| BGL_1c30030 | branched-chain amino acid ABC transporter, ATP-binding protein           | 3.1+        |       |       |
| BGL_1c30040 | inner-membrane translocator                                              | 3.2+        |       |       |
| BGL_1c30050 | ABC branched-chain amino acid family transporter, inner membrane protein | 3.2+        |       |       |
| BGL_1c30100 | 50S ribosomal protein L33                                                |             | 3.1+  | 5.0+  |
| BGL_1c30260 | multicopper oxidase family protein                                       |             |       | 2.2-  |
| BGL_1c30580 | 30S ribosomal protein S20                                                |             | 2.4+  | 3.9+  |
| BGL_1c30670 | methylated-DNA--protein-cysteinemethyl transferase Ogt                   |             |       | 2.3-  |
| BGL_1c30730 | thioredoxin                                                              |             |       | 2.1-  |
| BGL_1c30750 | pyridoxine/pyridoxamine 5'-phosphate oxidase PdxH                        | 2.2+        |       |       |
| BGL_1c31020 | zinc-containing alcohol dehydrogenasesuperfamilyprotein                  |             | 2.2+  | 2.1+  |
| BGL_1c31140 | sterol desaturase family protein                                         |             | 2.4+  |       |
| BGL_1c31150 | phospholipase/lecithinase/hemolysin-likeprotein                          | 2.1+        |       |       |
| BGL_1c31330 | hypothetical protein                                                     | 2.3-        |       | 2.4-  |

| Locus_tag          | Predicted function                                          | Fold change |             |             |
|--------------------|-------------------------------------------------------------|-------------|-------------|-------------|
|                    |                                                             | BGPG2       | BGPG3       | BGPG4       |
| BGL_1c31340        | hypothetical protein                                        | 2.5-        |             | 2.6-        |
| BGL_1c31350        | Rhs element Vgr protein                                     | 2.7-        |             |             |
| BGL_1c31500        | transcriptional regulator, ArgP family                      | 18.1-       |             |             |
| BGL_1c31660        | dTDP-glucose 4,6-dehydratase RfbB                           | 5.5-        | 2.5+        |             |
| BGL_1c31940        | putative cytochrome c4                                      | 2.2-        |             |             |
| BGL_1c31950        | putative periplasmic cytochrome ccontainingprotein          | 2.7-        |             |             |
| BGL_1c32020        | hypothetical protein                                        | 3.4-        |             |             |
| BGL_1c32050        | glycerol kinase GlpK                                        |             |             | 2.0-        |
| BGL_1c32150        | tetratricopeptide TPR_2 repeat protein                      |             |             | 2.0-        |
| BGL_1c32640        | hypothetical protein                                        | 5.3+        |             |             |
| BGL_1c33180        | cytochrome bd ubiquinol oxidase, subunit I                  |             | 2.4-        | 3.2-        |
| BGL_1c33190        | cytochrome d ubiquinol oxidase subunit 2                    |             | 2.4-        | 3.4-        |
| BGL_1c33400        | hypothetical protein                                        | 2.4-        |             |             |
| BGL_1c33410        | cytochrome c oxidase subunit 3 CtaE                         | 2.5-        |             |             |
| BGL_1c33420        | Protein of unknown function (DUF2970)                       | 2.2-        |             |             |
| BGL_1c33430        | cytochrome c oxidase assembly protein CtaG                  | 2.4-        |             |             |
| BGL_1c33720        | C4-dicarboxylate transport protein DctA                     | 2.6+        |             |             |
| BGL_1c34000        | hypothetical protein                                        |             | 2.5+        | 3.2+        |
| BGL_1c34010        | phospholipase, patatin family protein                       |             |             | 2.0-        |
| BGL_1c34340        | beta and gamma crystallin                                   | 5.3-        |             |             |
| BGL_1c34500        | <i>N</i> -acylglucosamine 2-epimerase family protein        |             | 2.7-        | 3.2-        |
| BGL_1c34970        | flagellar basal-body rod protein FlgG                       |             | 2.2+        | 3.1+        |
| BGL_1c34990        | flagellar hook protein FlgE                                 |             | 2.4+        | 4.1+        |
| BGL_1c35000        | flagellar hook capping protein FlgD                         |             | 2.4+        | 3.6+        |
| <b>BGL_1c35020</b> | <b>flagellar basal-body rod protein FlgB</b>                |             | <b>2.4+</b> | <b>4.4+</b> |
| BGL_1c35300        | PepSY-associated TM helix family protein                    |             |             | 2.2+        |
| BGL_1c35340        | flagellar protein FliS                                      |             | 2.1+        | 2.0+        |
| BGL_1c35360        | flagellar M-ring protein FliF                               |             | 3.6+        | 5.3+        |
| BGL_1c35370        | flagellar motor switch protein FliG                         |             | 2.1+        | 2.7+        |
| BGL_1c35380        | flagellar assembly protein FliH                             |             | 2.5+        | 3.6+        |
| BGL_1c35400        | flagellar export protein FliJ                               |             | 3.2+        | 3.8+        |
| BGL_1c35440        | NAD-dependent aldehyde dehydrogenase                        |             |             | 2.6-        |
| BGL_1c35870        | queuosine biosynthesis protein QueD                         | 2.0+        |             |             |
| BGL_1c36080        | hypothetical protein                                        | 4.4-        |             | 2.2+        |
| BGL_1c36090        | hypothetical protein                                        | 5.5-        | 2.2+        | 3.1+        |
| BGL_1c36100        | major facilitator superfamily MFS-1 transporter             | 3.3-        |             |             |
| BGL_2c00060        | hypothetical protein                                        | 3.0-        |             |             |
| BGL_2c00170        | major facilitator superfamily MFS-1 transporter             |             |             | 2.4-        |
| BGL_2c00180        | glucarate dehydratase                                       | 2.1+        |             |             |
| BGL_2c00190        | 5-dehydro-4-deoxyglucarate dehydratase                      | 2.6+        |             |             |
| BGL_2c00250        | hypothetical protein                                        | 2.2-        |             |             |
| BGL_2c00970        | putative antibiotic synthase, amino acid adenylation domain | 2.3-        |             |             |
| BGL_2c01450        | dimethyl sulfoxide reductase DmsA                           |             |             | 2.7-        |
| BGL_2c01470        | putative alcohol dehydrogenase, cytochrome c subunit        |             |             | 2.5-        |
| BGL_2c01540        | D-mannonate oxidoreductase UxuB                             | 2.4+        |             |             |



| Locus_tag   | Predicted function                                                                | Fold change |        |        |
|-------------|-----------------------------------------------------------------------------------|-------------|--------|--------|
|             |                                                                                   | BGPG2       | BGPG3  | BGPG4  |
| BGL_2c01560 | starvation-sensing protein RspA                                                   |             |        | 2.3-   |
| BGL_2c01820 | hypothetical protein                                                              |             | 2.1+   |        |
| BGL_2c01940 | hypothetical protein                                                              |             | 3.7+   | 5.0+   |
| BGL_2c01960 | putative periplasmic substrate-binding protein                                    | 4.6-        |        |        |
| BGL_2c01980 | putative monooxygenase MoxC                                                       | 3.4-        |        |        |
| BGL_2c02100 | 'putative HpaB; type III secretion chaperone, CesT family'                        |             | 3.4+   | 3.7+   |
| BGL_2c02450 | tyrocidine synthase 2                                                             | 2.1-        | 2.3+   | 3.5+   |
| BGL_2c02460 | phosphopantetheine attachment site domain protein, BarA-like                      |             | 2.6+   | 3.9+   |
| BGL_2c02470 | chlorinating enzyme, SyrB2/BarB2-like protein                                     | 2.9-        |        | 2.1+   |
| BGL_2c02480 | thioesterase type II, NRPS/PKS/S-FAS family, BarC-like                            | 2.7-        |        |        |
| BGL_2c02490 | putative transferase                                                              | 2.2-        |        |        |
| BGL_2c02500 | branched-chain amino acid aminotransferase IlvE                                   | 2.7-        |        | 2.0+   |
| BGL_2c02510 | thioesterase type II, NRPS/PKS/S-FAS family, BarC-like                            | 2.2-        |        |        |
| BGL_2c02520 | acetaldehyde dehydrogenase (acetylating)                                          | 2.2-        | 2.0+   |        |
| BGL_2c02530 | 4-hydroxy-2-oxovalerate aldolase family                                           | 2.4-        |        | 2.1+   |
| BGL_2c02540 | hypothetical protein, RmIC-like cupins superfamily                                |             |        | 2.2+   |
| BGL_2c02550 | putative translocator protein, LysE family                                        | 2.2-        |        |        |
| BGL_2c02560 | putative flavin reductase domain-containing protein                               | 2.2-        |        |        |
| BGL_2c03190 | putative alcohol dehydrogenase, zinc-binding domain protein                       |             |        | 2.1-   |
| BGL_2c03510 | putative lipoprotein                                                              |             | 2.2+   | 2.0+   |
| BGL_2c03650 | putative L-sorbose dehydrogenase                                                  | 6.5-        | 3.6-   | 6.2-   |
| BGL_2c03660 | hypothetical protein                                                              | 7.0-        | 3.1-   | 5.2-   |
| BGL_2c03670 | putative transcriptional regulator, LysR family                                   | 2.2-        | 2.2-   |        |
| BGL_2c03680 | isoquinoline 1-oxidoreductase subunit alpha                                       | 2.4-        | 2.4-   | 3.1-   |
| BGL_2c03690 | isoquinoline 1-oxidoreductase subunit beta                                        |             | 3.3-   | 3.7-   |
| BGL_2c03700 | putative membrane-bound alcohol dehydrogenase, cytochrome c subunit               |             | 3.1-   | 4.0-   |
| BGL_2c03710 | putative XdhC-CoxI family protein                                                 |             | 3.7-   | 4.6-   |
| BGL_2c03720 | putative transcriptional regulator, LysR family                                   | 2.3-        |        | 2.3-   |
| BGL_2c03780 | hypothetical protein                                                              |             |        | 2.4-   |
| BGL_2c03790 | putative transcriptional regulator, LysR family                                   | 2.3-        |        |        |
| BGL_2c03800 | putative aldo/keto reductase                                                      | 3.0-        | 3.1-   | 2.9-   |
| BGL_2c03810 | branched-chain amino acid aminotransferase                                        | 2.0-        | 2.1-   | 2.3-   |
| BGL_2c03830 | Mn <sup>2+</sup> /Fe <sup>2+</sup> transporter NRAMP family                       | 22.4-       | 16.6-  | 12.4-  |
| BGL_2c03840 | hypothetical protein                                                              | 91.8-       | 55.8-  | 104.1- |
| BGL_2c03850 | cysteine synthase CysB                                                            | 69.9-       | 54.3-  | 51.5-  |
| BGL_2c03860 | putative SAM-dependent methyltransferase                                          | 128.0-      | 53.3-  | 67.4-  |
| BGL_2c03870 | carbamoyltransferase family protein                                               | 111.4-      | 63.7-  | 63.7-  |
| BGL_2c03880 | putative alpha/beta hydrolase fold protein                                        | 131.0-      | 60.5-  | 98.3-  |
| BGL_2c03890 | putative luciferase family protein                                                | 108.4-      | 39.2-  | 42.7-  |
| BGL_2c03900 | hypothetical protein                                                              | 225.7-      | 148.4- | 193.4- |
| BGL_2c03910 | putative phytanoyl-CoA dioxygenase family protein                                 | 149.8-      | 50.9-  | 52.9-  |
| BGL_2c03920 | ABC transporter family protein, ATP-binding and transmembrane domain, <i>abc1</i> | 32.5-       | 18.8-  | 22.5-  |
| BGL_2c03930 | hypothetical protein                                                              | 23.8-       | 18.9-  | 26.8-  |
| BGL_2c03940 | putative non-ribosomal peptide synthase                                           | 22.8-       | 18.8-  | 25.5-  |
| BGL_2c03950 | putative aminoglycoside phosphotransferase                                        | 33.6-       | 21.0-  | 23.2-  |

| Locus_tag   | Predicted function                                                                | Fold change |       |       |
|-------------|-----------------------------------------------------------------------------------|-------------|-------|-------|
|             |                                                                                   | BGPG2       | BGPG3 | BGPG4 |
| BGL_2c03960 | putative thiopurine S-methyltransferase family protein                            | 24.8-       | 8.4-  | 17.5- |
| BGL_2c03970 | hypothetical protein                                                              | 15.7-       | 4.5+  | 5.7-  |
| BGL_2c03980 | acyl-homoserine-lactone synthase LasI                                             | 10.5-       | 68.3- | 5.7-  |
| BGL_2c03990 | transcriptional activator protein LasR                                            | 5.9-        |       | 4.3-  |
| BGL_2c04000 | ABC transporter, ATP-binding/permease protein                                     |             |       | 2.7-  |
| BGL_2c04010 | hypothetical protein                                                              |             |       | 2.5-  |
| BGL_2c04020 | putative 4Fe-4S ferredoxin, iron-sulfur binding domain protein                    |             | 2.1-  | 2.9-  |
| BGL_2c04050 | transcriptional regulator, IclR family                                            | 2.0-        | 2.0-  | 2.1-  |
| BGL_2c04070 | methyl-accepting chemotaxis sensory transducer with Pas/Pac sensor                | 2.1-        |       |       |
| BGL_2c04090 | succinate-semialdehyde dehydrogenase (NADP+)                                      | 2.4-        |       |       |
| BGL_2c04100 | 4-aminobutyrate aminotransferase                                                  | 2.9-        |       |       |
| BGL_2c04110 | transcriptional regulator, GntR family                                            |             | 2.3-  | 2.8-  |
| BGL_2c04130 | hypothetical protein                                                              | 2.1-        |       | 2.0-  |
| BGL_2c04190 | hypothetical protein                                                              | 2.7-        |       |       |
| BGL_2c04200 | transposase IS3/IS911 family protein                                              | 2.6-        |       |       |
| BGL_2c04210 | putative transposase                                                              | 2.9-        | 2.1-  | 2.5-  |
| BGL_2c04220 | putative transposase                                                              | 2.5-        |       |       |
| BGL_2c04230 | putative type VI secretion system Vgr family protein                              | 2.6-        | 2.5-  | 3.7-  |
| BGL_2c04250 | putative membrane protein                                                         | 9.1-        | 2.8-  | 2.3-  |
| BGL_2c04260 | selenide, water dikinase SelD                                                     | 2.6-        | 2.5-  | 2.8-  |
| BGL_2c04280 | cation diffusion facilitator family transporter                                   |             | 2.3-  | 2.4-  |
| BGL_2c04290 | putative purine nucleoside permease                                               | 4.3-        | 2.7-  | 4.1-  |
| BGL_2c04300 | putative exported protein                                                         | 6.9-        | 3.3-  | 2.6-  |
| BGL_2c04310 | aspartate-proton symporter YveA                                                   | 2.0-        | 2.0-  | 2.2-  |
| BGL_2c04320 | putative malate/L-lactate dehydrogenase                                           | 2.3-        | 2.4-  | 2.6-  |
| BGL_2c04330 | transcriptional regulator, LysR family                                            |             | 2.5-  | 2.9-  |
| BGL_2c04340 | alpha/beta hydrolase                                                              | 2.6-        | 2.6-  | 3.3-  |
| BGL_2c04350 | RND efflux transporter, MFP subunit                                               | 3.8-        | 4.8-  | 3.6-  |
| BGL_2c04360 | RND efflux transporter, hydrophobe/amphiphile efflux-1 (HAE1) family              | 3.5-        | 3.6-  | 3.8-  |
| BGL_2c04370 | RND efflux transporter, outer membrane factor (OMF) lipoprotein, NodT family      | 2.1-        | 3.0-  | 3.3-  |
| BGL_2c04400 | hypothetical protein                                                              | 2.0-        | 2.4-  | 2.2-  |
| BGL_2c04410 | acyl-CoA dehydrogenase                                                            | 2.6-        | 2.6-  | 2.6-  |
| BGL_2c04420 | hypothetical protein                                                              | 3.4-        |       |       |
| BGL_2c04450 | transcriptional regulatory protein QseB                                           | 2.1-        | 2.7-  | 3.2-  |
| BGL_2c04460 | sensor protein QseC                                                               |             | 2.2-  | 2.5-  |
| BGL_2c04470 | phosphoserine transaminase                                                        | 2.2-        | 2.5-  | 3.2-  |
| BGL_2c04480 | two component heavy metal response transcriptional regulator, winged helix family |             | 2.2-  | 2.8-  |
| BGL_2c04490 | heavy metal sensor signal transduction histidine kinase                           |             | 2.6-  | 3.1-  |
| BGL_2c04610 | D-galactonate transporter, MFS transport family                                   | 3.5-        | 8.2-  | 7.3-  |
| BGL_2c04620 | aldehyde dehydrogenase                                                            | 5.0-        | 8.8-  | 7.7-  |
| BGL_2c04630 | tryptophanyl-tRNA synthase TrpS                                                   |             | 3.8-  | 4.9-  |
| BGL_2c04640 | 5-dehydro-4-deoxyglucarate dehydratase                                            | 3.7-        | 4.3-  | 2.8-  |
| BGL_2c04650 | D-galactarate dehydratase GarD                                                    |             | 5.6-  | 5.2-  |
| BGL_2c04660 | hypothetical protein                                                              | 3.3-        |       | 3.1-  |

| Locus_tag   | Predicted function                                                                | Fold change |       |       |
|-------------|-----------------------------------------------------------------------------------|-------------|-------|-------|
|             |                                                                                   | BGPG2       | BGPG3 | BGPG4 |
| BGL_2c04670 | acetyltransferase                                                                 | 3.8-        |       |       |
| BGL_2c04680 | hypothetical protein, DoxX family                                                 | 6.2-        |       |       |
| BGL_2c04710 | proline racemase                                                                  |             | 2.0-  | 3.2-  |
| BGL_2c04750 | transcriptional regulator, AraC family                                            | 3.0-        | 2.1-  | 2.3-  |
| BGL_2c04770 | 4-hydroxyphenylpyruvate dioxygenase                                               | 4.0-        | 6.0-  | 4.9-  |
| BGL_2c04780 | 3-dehydroquinase dehydratase AroQ, type-II 3-dehydroquinase family                |             | 2.1-  | 2.3-  |
| BGL_2c04790 | shikimate 5-dehydrogenase AroE                                                    |             | 2.6-  | 3.1-  |
| BGL_2c04800 | putative glucarate transporter GudP                                               |             | 2.1-  | 2.6-  |
| BGL_2c04810 | 2-aminoethylphosphonate-pyruvate transaminase PhnW                                | 8.4-        | 6.2-  | 14.3- |
| BGL_2c04820 | 2-aminoethylphosphonate ABC transport, periplasmic substrate-binding protein PhnS | 4.2-        | 4.6-  | 5.2-  |
| BGL_2c04830 | 2-aminoethylphosphonate ABC transport, ATP-binding protein PhnT                   | 4.7-        | 2.1-  | 2.2-  |
| BGL_2c04840 | 2-aminoethylphosphonate ABC transport, permease protein PhnU                      | 3.9-        |       | 2.1-  |
| BGL_2c04850 | 2-aminoethylphosphonate ABC transport, membrane protein PhnV                      | 3.2-        |       | 2.4-  |
| BGL_2c04860 | phosphonoacetate hydrolase PhnA                                                   | 4.1-        | 3.6-  | 6.0-  |
| BGL_2c04870 | HD phosphohydrolase-like protein                                                  | 4.5-        | 3.0-  | 4.8-  |
| BGL_2c04930 | hypothetical protein                                                              |             | 2.5+  | 6.0+  |
| BGL_2c05050 | serine-type carboxypeptidase                                                      |             |       | 2.1-  |
| BGL_2c05630 | long-chain-fatty-acid-CoA ligase FadD                                             | 2.2-        | 2.2+  | 3.3+  |
| BGL_2c05670 | putative membrane-anchored cell surface protein                                   | 36.9-       |       | 2.5-  |
| BGL_2c05770 | hydroxylamine reductase, hybrid-cluster protein                                   | 2.8-        |       |       |
| BGL_2c05800 | putative hydroxypyruvate isomerase                                                |             |       | 2.3-  |
| BGL_2c05930 | flavin-type monooxygenase                                                         |             |       | 2.3-  |
| BGL_2c06160 | tyrosine-specific transport protein TyrP                                          | 2.5+        |       |       |
| BGL_2c06180 | glutamate/gamma-aminobutyrate antiporter                                          | 3.0+        | 2.7-  |       |
| BGL_2c06390 | L-serine dehydratase SdaA                                                         |             | 2.4+  |       |
| BGL_2c06420 | sarcosine oxidase subunit alpha SoxA                                              | 2.0+        | 2.4+  |       |
| BGL_2c06440 | dihydroneopterin aldolase                                                         |             | 2.0+  | 2.2-  |
| BGL_2c06460 | CsbD family protein                                                               |             | 3.7+  | 3.4+  |
| BGL_2c06600 | NADH flavin oxidoreductase/NADH oxidase                                           |             |       | 2.3-  |
| BGL_2c06700 | phosphoesterase family protein                                                    | 2.2-        |       |       |
| BGL_2c07030 | alpha/beta hydrolase                                                              | 2.1-        |       |       |
| BGL_2c07040 | hypothetical protein                                                              | 2.2-        |       |       |
| BGL_2c07100 | peptidase S1 and S6, chymotrypsin/Hap                                             |             |       | 2.0-  |
| BGL_2c07470 | rhamnosyltransferase I subunit A                                                  | 26.0-       |       |       |
| BGL_2c07480 | rhamnosyltransferase I subunit B                                                  | 30.7-       |       |       |
| BGL_2c07490 | multidrug resistance protein B                                                    | 18.9-       |       |       |
| BGL_2c07500 | rhamnosyltransferase I subunit C                                                  | 29.9-       |       |       |
| BGL_2c07510 | RND efflux transporter, outer membrane factor (OMF) lipoprotein, NodT family      | 16.3-       |       |       |
| BGL_2c07520 | secretion protein, HlyD family                                                    | 4.0-        |       |       |
| BGL_2c07530 | chitinase                                                                         | 12.5-       |       |       |
| BGL_2c07540 | aldolase, isopropylmalate synthase-like protein                                   | 69.6-       |       |       |
| BGL_2c07550 | hypothetical protein, haem oxygenase-like                                         | 16.4-       |       | 2.0+  |
| BGL_2c07560 | branched-chain amino acid aminotransferase IlvE                                   | 14.1-       |       |       |

| Locus_tag   | Predicted function                                                                                   | Fold change |       |       |
|-------------|------------------------------------------------------------------------------------------------------|-------------|-------|-------|
|             |                                                                                                      | BGPG2       | BGPG3 | BGPG4 |
| BGL_2c07570 | hypothetical protein, <i>N</i> -acetylglucosaminyl phosphatidylinositol de- <i>N</i> -acetylase-like | 9.2-        |       |       |
| BGL_2c07580 | phenazine biosynthesis-like protein                                                                  | 10.9-       |       |       |
| BGL_2c07590 | phosphoribosyl glycinamide synthase                                                                  | 5.9-        |       |       |
| BGL_2c07600 | tetracycline resistance protein TetA                                                                 | 3.9-        |       |       |
| BGL_2c07900 | hypothetical protein                                                                                 |             | 2.9+  | 3.2+  |
| BGL_2c07940 | hypothetical protein                                                                                 |             |       | 2.1-  |
| BGL_2c08030 | 3-hydroxybutyrate dehydrogenase BdhA                                                                 |             |       | 3.2-  |
| BGL_2c08040 | enoyl-CoA hydratase                                                                                  |             |       | 3.1-  |
| BGL_2c08060 | DNA binding protein                                                                                  | 4.3-        |       |       |
| BGL_2c08120 | glycoside hydrolase-like protein                                                                     | 10.7-       |       |       |
| BGL_2c08160 | penicillin-binding protein, 1A family; Pbp-1a; PBP1a                                                 |             | 2.0-  | 2.7-  |
| BGL_2c08180 | putative chitinase                                                                                   | 2.5-        |       |       |
| BGL_2c08450 | hypothetical protein                                                                                 |             | 2.4+  | 2.5+  |
| BGL_2c08490 | transcriptional regulator, LacI family                                                               | 3.8-        |       |       |
| BGL_2c08880 | hypothetical protein                                                                                 | 2.4+        |       |       |
| BGL_2c08910 | threonine ammonia-lyase, biosynthetic                                                                | 2.4+        |       | 2.4+  |
| BGL_2c08980 | hypothetical protein                                                                                 |             | 2.5+  | 2.2+  |
| BGL_2c09000 | PepSY and peptidase M4 protein                                                                       | 2.4-        |       |       |
| BGL_2c09010 | TonB-dependent siderophore receptor                                                                  | 3.3-        |       |       |
| BGL_2c09060 | hypothetical protein                                                                                 |             | 2.1+  |       |
| BGL_2c09510 | putative exported protein                                                                            |             | 2.7+  | 3.3+  |
| BGL_2c09540 | methyl-accepting chemotaxis sensory transducer                                                       | 2.2-        |       |       |
| BGL_2c09820 | allophanate hydrolase                                                                                | 3.0+        |       |       |
| BGL_2c09830 | transcriptional regulator, LysR family                                                               | 2.5+        |       |       |
| BGL_2c09850 | <i>N</i> -hexanoyl homoserine lactone synthase RhII/TofI                                             | 4.1-        |       |       |
| BGL_2c09860 | hypothetical protein                                                                                 | 25.1-       |       |       |
| BGL_2c09870 | <i>N</i> -octanoyl homoserine lactone synthase RhIR/TofR                                             | 5.6+        |       |       |
| BGL_2c09990 | amidase                                                                                              |             | 2.0-  | 2.6-  |
| BGL_2c10110 | hydrolase, epoxide hydrolase-like                                                                    |             | 2.0-  |       |
| BGL_2c10120 | metal-dependent hydrolase                                                                            | 2.0+        |       |       |
| BGL_2c10130 | short chain dehydrogenase                                                                            | 2.4+        |       |       |
| BGL_2c10140 | flavin-containing monooxygenase                                                                      | 2.5+        |       |       |
| BGL_2c10150 | transcriptional regulator, LysR family                                                               | 2.3-        |       |       |
| BGL_2c10160 | hypothetical protein                                                                                 | 2.4-        |       |       |
| BGL_2c10170 | hypothetical protein                                                                                 | 4.0+        |       |       |
| BGL_2c10520 | 2-dehydropantoate 2-reductase PanE                                                                   |             |       | 2.0-  |
| BGL_2c10540 | putative cyanate transport protein CynX, MFS family                                                  | 2.1-        |       |       |
| BGL_2c10630 | hypothetical protein                                                                                 |             |       | 2.3-  |
| BGL_2c10640 | hypothetical protein                                                                                 |             | 2.1-  | 3.6-  |
| BGL_2c10650 | hypothetical protein                                                                                 |             |       | 2.6-  |
| BGL_2c10660 | hypothetical protein                                                                                 |             |       | 2.5-  |
| BGL_2c10690 | transcriptional regulator, LysR family                                                               |             |       | 2.2-  |
| BGL_2c10910 | oxalyl-CoA decarboxylase Oxc                                                                         |             |       | 2.9-  |
| BGL_2c10920 | formyl-CoA oxalate CoA-transferase Frc                                                               |             |       | 2.9-  |
| BGL_2c10940 | hypothetical protein                                                                                 |             |       | 2.8-  |

| Locus_tag   | Predicted function                                               | Fold change |       |       |
|-------------|------------------------------------------------------------------|-------------|-------|-------|
|             |                                                                  | BGPG2       | BGPG3 | BGPG4 |
| BGL_2c10950 | hypothetical protein                                             |             |       | 2.7-  |
| BGL_2c11060 | alpha-L-arabinofuranosidase B                                    | 4.5-        |       |       |
| BGL_2c11280 | TRAP dicarboxylate transporter, DctP subunit                     | 2.0+        |       |       |
| BGL_2c11580 | hypothetical protein, transglutaminase-like                      |             |       | 2.1-  |
| BGL_2c11690 | channel protein, hemolysin III family protein                    | 2.2+        |       |       |
| BGL_2c11830 | putative periplasmic substrate-binding protein                   | 2.6+        |       |       |
| BGL_2c11950 | thermostable hemolysin                                           | 2.3-        | 2.3+  | 3.3+  |
| BGL_2c11990 | flavin-dependent oxidoreductase-like protein                     |             |       | 2.8+  |
| BGL_2c12190 | quinoprotein glucose dehydrogenase Gcd                           | 4.5-        |       |       |
| BGL_2c12340 | putative exported protein                                        | 3.1+        |       |       |
| BGL_2c12350 | alpha/beta hydrolase                                             | 3.0+        |       |       |
| BGL_2c12360 | putative glyoxalase (dioxxygenase domain)                        | 2.9+        |       |       |
| BGL_2c12370 | uncharacterized Rieske-protein, [2Fe-2S] center                  | 2.4+        |       |       |
| BGL_2c12380 | monooxygenase FAD-binding, aromatic-ring hydroxylase-like        | 2.6+        |       |       |
| BGL_2c12390 | MFS general substrate transporter                                | 2.1+        |       |       |
| BGL_2c12400 | putative cyclase                                                 | 2.0+        |       |       |
| BGL_2c12420 | putative fumarylacetoacetate hydrolase                           |             |       | 2.2-  |
| BGL_2c12620 | putative mandelate racemase                                      | 2.3+        |       |       |
| BGL_2c12640 | D-galactonate transporter, MFS transport family                  | 2.2+        |       |       |
| BGL_2c12870 | thiamine pyrophosphate enzyme-like TPP binding region            |             |       | 2.2-  |
| BGL_2c12970 | putative hippurate hydrolase                                     |             | 2.3-  | 3.9-  |
| BGL_2c13840 | hypothetical protein                                             |             |       | 2.0-  |
| BGL_2c13850 | hypothetical protein                                             |             |       | 2.5-  |
| BGL_2c13860 | hypothetical protein                                             |             |       | 2.3-  |
| BGL_2c13870 | 30S ribosomal protein S21                                        |             |       | 2.1-  |
| BGL_2c13890 | cold shock-like protein CspA                                     | 2.7+        | 5.7+  | 3.7+  |
| BGL_2c13950 | putative signal peptide protein                                  | 2.1-        |       |       |
| BGL_2c13960 | tetratricopeptide TPR_2                                          | 2.4-        |       |       |
| BGL_2c13970 | putative lipoprotein                                             | 2.7-        |       |       |
| BGL_2c13980 | putative transmembrane protein                                   | 2.5-        |       |       |
| BGL_2c13990 | hypothetical transmembrane protein                               | 2.3-        |       |       |
| BGL_2c14000 | glycosyl transferase, group 1                                    | 2.6-        |       |       |
| BGL_2c14010 | putative transmembrane protein                                   | 2.7-        |       |       |
| BGL_2c14020 | hypothetical protein                                             | 2.3-        |       |       |
| BGL_2c14110 | hypothetical protein                                             |             | 2.4+  | 2.1+  |
| BGL_2c14120 | putative transcriptional regulator, GntR family protein          | 2.6-        |       | 2.0+  |
| BGL_2c14140 | alkylhydroperoxidase AhpD-like protein                           | 3.0-        |       |       |
| BGL_2c14150 | acyl-CoA synthases (AMP-forming)/AMP-acid ligase II-like protein | 2.7-        |       |       |
| BGL_2c14160 | phenylacetate-CoA oxygenase, PaaA subunit                        | 3.2-        |       |       |
| BGL_2c14250 | anthranilate synthase component 1 TrpE                           | 2.4-        |       |       |
| BGL_2c14530 | hypothetical protein                                             | 2.1+        |       |       |
| BGL_2c14540 | putative lipoprotein                                             | 2.1+        |       |       |
| BGL_2c14550 | putative lipoprotein                                             |             |       | 2.1-  |
| BGL_2c14690 | hypothetical protein                                             |             | 2.8+  | 2.6+  |
| BGL_2c14880 | hypothetical protein                                             | 11.8-       |       |       |

| Locus_tag   | Predicted function                                         | Fold change |       |       |
|-------------|------------------------------------------------------------|-------------|-------|-------|
|             |                                                            | BGPG2       | BGPG3 | BGPG4 |
| BGL_2c14890 | hypothetical protein                                       | 6.6-        |       |       |
| BGL_2c14900 | TonB-dependent siderophore receptor                        |             |       | 4.0+  |
| BGL_2c15120 | methyl-accepting chemotaxis sensory transducer             | 3.6-        |       |       |
| BGL_2c15150 | glyoxalase/bleomycin resistance protein/dioxygenase        |             |       | 2.3-  |
| BGL_2c15220 | hypothetical protein                                       |             | 6.0+  | 6.1+  |
| BGL_2c15240 | NADH oxidoreductase containing a GroES-like domain         |             |       | 2.3-  |
| BGL_2c15420 | Protein of unknown function (DUF3304)                      |             | 2.8+  | 2.3+  |
| BGL_2c15550 | hypothetical protein                                       | 5.3-        |       |       |
| BGL_2c15730 | ABC transporter-like protein                               | 2.9+        |       |       |
| BGL_2c15830 | hypothetical protein                                       | 3.2-        |       |       |
| BGL_2c15840 | hypothetical protein                                       | 4.0-        |       |       |
| BGL_2c15850 | mandelate racemase                                         | 3.9-        |       |       |
| BGL_2c16310 | GCN5-like N-acetyltransferase                              |             |       | 2.3-  |
| BGL_2c16320 | D-isomer specific 2-hydroxyacid dehydrogenase, NAD-binding |             |       | 2.0-  |
| BGL_2c16410 | drug resistance transporter, EmrB/QacA subfamily           | 305.1-      |       |       |
| BGL_2c16420 | secretion protein, HlyD family                             | 368.3-      |       |       |
| BGL_2c16430 | RND efflux system, outer membrane lipoprotein, NodT family | 313.9-      |       |       |
| BGL_2c16450 | polyketide cyclase/dehydrase                               | 74.8-       |       |       |
| BGL_2c16460 | putative non-ribosomal peptide synthase                    | 98.5-       |       |       |
| BGL_2c16470 | hypothetical protein                                       | 214.4-      |       |       |
| BGL_2c16480 | hypothetical protein, RmIC-like cupins superfamily         | 327.6-      | 2.2-  |       |
| BGL_2c16490 | hypothetical protein                                       | 397.5-      |       |       |
| BGL_2c16500 | transcriptional regulator, AraC family                     | 19.8-       |       |       |
| BGL_2c16510 | transcriptional regulator, LuxR family                     | 4.1-        |       | 2.1+  |
| BGL_2c16800 | nitrite reductase NAD(P)H small subunit                    | 2.3-        |       | 2.8-  |
| BGL_2c16810 | nitrite reductase NAD(P)H large subunit                    | 2.1-        | 2.5-  | 3.1-  |
| BGL_2c17020 | hypothetical protein                                       | 2.1-        |       |       |
| BGL_2c17290 | hypothetical protein                                       |             |       | 2.1-  |
| BGL_2c17410 | hypothetical protein                                       |             | 6.1+  |       |
| BGL_2c17420 | hypothetical protein                                       |             | 6.5+  | 2.0-  |
| BGL_2c17470 | drug resistance transporter, EmrB/QacA family              | 5.1-        | 2.0+  |       |
| BGL_2c17500 | transcriptional regulator, LysR family                     | 2.0-        |       |       |
| BGL_2c17680 | glutamate-1-semialdehyde 2,1-aminomutase HemL              | 2.3-        |       |       |
| BGL_2c17690 | hypothetical protein                                       | 6.7-        |       |       |
| BGL_2c17700 | putative non-ribosomal peptide synthase                    | 2.9-        |       |       |
| BGL_2c18200 | succinate dehydrogenase cytochrome b556 subunit            |             | 2.1+  | 2.5+  |
| BGL_2c18330 | FAD/FMN-containing dehydrogenases                          | 2.1+        |       |       |
| BGL_2c18550 | putative mutt/nudix hydrolase                              | 2.2-        |       |       |
| BGL_2c18660 | lipase LipA                                                | 2.5-        |       | 2.3-  |
| BGL_2c18690 | hypothetical protein                                       |             | 2.3+  | 2.6+  |
| BGL_2c18700 | hypothetical protein                                       | 2.1-        |       |       |
| BGL_2c18890 | transcriptional regulator, GntR family                     | 2.1-        |       |       |
| BGL_2c18910 | PPE-repeat protein                                         | 4.7-        |       |       |
| BGL_2c18920 | hypothetical protein                                       | 2.4-        |       |       |
| BGL_2c18940 | hypothetical protein                                       | 6.0-        |       |       |

| Locus_tag   | Predicted function                                                                      | Fold change |       |       |
|-------------|-----------------------------------------------------------------------------------------|-------------|-------|-------|
|             |                                                                                         | BGPG2       | BGPG3 | BGPG4 |
| BGL_2c18980 | pseudomonalysin                                                                         | 10.9-       |       |       |
| BGL_2c19200 | acyltransferase                                                                         |             | 2.4+  | 2.5+  |
| BGL_2c19430 | methyl-accepting chemotaxis sensory transducer                                          | 5.2-        |       |       |
| BGL_2c19440 | hypothetical protein                                                                    | 5.3-        |       |       |
| BGL_2c20210 | hypothetical protein                                                                    | 2.9-        |       |       |
| BGL_2c20220 | putative phospholipase D / transphosphatidylase                                         | 9.1-        |       |       |
| BGL_2c20230 | hypothetical protein                                                                    | 108.5-      |       |       |
| BGL_2c20240 | hypothetical protein                                                                    | 28.5-       |       |       |
| BGL_2c20250 | hypothetical protein                                                                    | 27.7-       | 2.0+  |       |
| BGL_2c20260 | RNA polymerase sigma factor 70                                                          | 24.0-       | 2.0+  |       |
| BGL_2c20280 | hypothetical protein                                                                    | 10.5-       |       |       |
| BGL_2c20290 | hypothetical protein                                                                    | 33.1-       |       | 2.1-  |
| BGL_2c20300 | hypothetical protein                                                                    | 43.6-       |       |       |
| BGL_2c20310 | hypothetical protein                                                                    | 7.4-        |       |       |
| BGL_2c20320 | 2-aminoethylphosphonate-pyruvate transaminase PhnW                                      | 3.7-        |       |       |
| BGL_2c20330 | O-acetylhomoserine/O-acetylserine sulfhydrylase                                         | 4.4-        |       |       |
| BGL_2c20340 | fatty acid desaturase type 1                                                            | 4.3-        |       |       |
| BGL_2c20350 | glutamine amidotransferase type 1                                                       | 4.4-        |       |       |
| BGL_2c20370 | glucose-methanol-choline oxidoreductase                                                 | 3.3-        |       |       |
| BGL_2c20530 | transcriptional regulator, LysR family                                                  | 2.3-        |       |       |
| BGL_2c20610 | hypothetical protein                                                                    | 3.7-        |       |       |
| BGL_2c20620 | ABC transporter, substrate binding protein                                              | 3.0-        |       |       |
| BGL_2c20630 | ABC transporter, permease protein                                                       | 2.7-        |       |       |
| BGL_2c20660 | putative acetylpolymine aminohydrolase AphA                                             | 2.2-        |       |       |
| BGL_2c20670 | putative glycoside hydrolase                                                            | 7.7-        |       |       |
| BGL_2c20920 | glycoside hydrolase family 28                                                           | 2.7+        |       |       |
| BGL_2c21180 | glutamine ABC transporter substrate binding protein                                     |             |       | 2.3-  |
| BGL_2c21190 | glutamine ABC transporter permease protein                                              |             |       | 2.6-  |
| BGL_2c21770 | alpha amylase                                                                           | 2.3-        |       | 2.8-  |
| BGL_2c21940 | glycosyl transferase                                                                    |             |       | 2.1-  |
| BGL_2c22020 | putative transposase of IS4/5 family (DUF4096)                                          | 2.1-        |       |       |
| BGL_2c22460 | type VI secretion system Vgr family protein                                             | 2.4-        |       |       |
| BGL_2c22490 | spermidine/putrescine ABC transporter periplasmic spermidine/putrescine-binding protein | 2.8-        |       |       |
| BGL_2c22500 | spermidine/putrescine ABC transporter permease protein                                  | 3.7-        |       |       |
| BGL_2c22570 | putative glucose uptake permease                                                        | 2.1-        |       | 2.0-  |
| BGL_2c22580 | hypothetical protein                                                                    | 5.0-        |       |       |
| BGL_2c22590 | putative translation initiation inhibitor                                               | 5.8-        |       |       |
| BGL_2c22600 | asparagine synthase, glutamine-hydrolyzing AsnB                                         | 6.2-        |       |       |
| BGL_2c22610 | 3-phosphoshikimate 1-carboxyvinyltransferase AroA                                       | 7.7-        |       |       |
| BGL_2c22620 | 3-phosphoshikimate 1-carboxyvinyltransferase AroA                                       | 7.6-        |       |       |
| BGL_2c22750 | aldehyde dehydrogenase                                                                  |             |       | 2.3-  |
| BGL_2c22830 | hypothetical protein                                                                    |             | 2.8+  | 2.3+  |
| BGL_2c23140 | ribose transport system permease protein RbsC                                           |             |       | 2.0-  |
| BGL_2c23230 | hypothetical protein                                                                    | 2.5+        | 2.2+  | 2.3+  |
| BGL_2c23260 | putative lipoprotein                                                                    | 137.3-      |       | 3.0-  |

| Locus_tag   | Predicted function                                                               | Fold change |       |       |
|-------------|----------------------------------------------------------------------------------|-------------|-------|-------|
|             |                                                                                  | BGPG2       | BGPG3 | BGPG4 |
| BGL_2c23270 | hypothetical membrane protein                                                    | 43.8-       |       |       |
| BGL_2c23280 | nitrate reductase alpha subunit                                                  | 2.5+        |       |       |
| BGL_2c23410 | thiaminase I precursor                                                           | 21.9-       |       |       |
| BGL_2c23420 | phosphomethylpyrimidine kinase ThiD                                              | 21.8-       |       |       |
| BGL_2c23430 | methyltransferase type 11                                                        | 21.6-       |       |       |
| BGL_2c23440 | thymidylate synthase ThyA                                                        | 22.2-       |       |       |
| BGL_2c23450 | nucleoside 2-deoxyribosyltransferase                                             | 22.9-       |       |       |
| BGL_2c23460 | MutT/Nudix hydrolase                                                             | 21.0-       |       |       |
| BGL_2c23470 | phosphoethanolamine N-methyltransferase                                          | 157.8-      |       |       |
| BGL_2c23480 | gamma-butyrobetaine 2-oxoglutarate dioxygenase                                   | 104.7-      |       |       |
| BGL_2c23570 | hypothetical protein                                                             | 3.8+        |       |       |
| BGL_2c23940 | response regulator receiver protein                                              | 71.3-       |       |       |
| BGL_2c23990 | acyl-CoA <i>N</i> -acyltransferase                                               |             |       | 2.3-  |
| BGL_2c24060 | fimbrial biogenesis outer membrane usher protein                                 |             |       | 2.3-  |
| BGL_2c24070 | pili assembly chaperone                                                          |             |       | 2.3-  |
| BGL_2c24110 | glyoxalase/bleomycin resistance protein/dioxygenase                              |             |       | 2.9-  |
| BGL_2c24130 | amylase- $\alpha$ -1,6-glucosidase family                                        |             |       | 2.2-  |
| BGL_2c24160 | sensor histidine kinase                                                          | 2.2+        |       |       |
| BGL_2c24570 | hypothetical protein                                                             | 2.7-        | 2.8+  | 2.6+  |
| BGL_2c24900 | putative NmrA-like family protein                                                | 3.9+        |       |       |
| BGL_2c24910 | maleylacetoacetate isomerase MaiA                                                | 3.1+        |       |       |
| BGL_2c24930 | homogentisate 1,2-dioxygenase HmgA                                               | 3.2+        |       |       |
| BGL_2c24950 | putative insertion element protein                                               | 9.3-        |       |       |
| BGL_2c24960 | hypothetical protein, CoA-dependent acyltransferase                              | 10.7-       |       |       |
| BGL_2c24990 | putative PAS/PAC sensor signal transduction histidine kinase                     | 2.2-        |       |       |
| BGL_2c25000 | putative haem oxygenase-like protein                                             | 2.1-        |       |       |
| BGL_2c25210 | putative xanthine dehydrogenase YagR molybdenum-binding subunit                  |             |       | 2.0-  |
| BGL_2c25430 | putative exported protein                                                        | 2.2-        |       |       |
| BGL_2c25640 | putative membrane protein                                                        | 2.3+        |       |       |
| BGL_2c25680 | putative membrane protein DUF1295                                                | 2.3-        |       |       |
| BGL_2c25690 | cyclopropane-fatty-acyl-phospholipid synthase (cyclopropane fatty acid synthase) | 2.7-        |       | 2.7-  |
| BGL_2c25700 | lipocalin-like protein                                                           | 2.5-        |       | 3.0-  |
| BGL_2c25750 | major facilitator superfamily MFS-1 transporter                                  | 3.3-        |       |       |
| BGL_2c25760 | MlrC domain protein                                                              | 3.0-        |       |       |
| BGL_2c25770 | hypothetical protein                                                             | 2.9-        |       |       |
| BGL_2c25840 | putative flavin-containing monooxygenase                                         | 2.0+        |       |       |
| BGL_2c25850 | putative short-chain dehydrogenase/reductase SDR                                 | 2.8+        |       |       |
| BGL_2c25860 | hypothetical protein                                                             | 2.2+        |       |       |
| BGL_2c26140 | hypothetical protein                                                             |             | 2.1+  | 2.2+  |
| BGL_2c26180 | putative NAD(P)H dehydrogenase (quinone)                                         | 2.3-        | 2.0+  |       |
| BGL_2c26190 | putative GCN5-like N-acetyltransferase (GNAT)                                    | 3.7-        | 2.6+  |       |
| BGL_2c26210 | putative alginate lyase 2                                                        | 2.9-        |       |       |
| BGL_2c26310 | putative glycoside hydrolase family 3 domain protein                             | 2.2-        |       |       |
| BGL_2c26400 | hypothetical protein                                                             |             |       | 2.2-  |
| BGL_2c26450 | putative prokaryotic membrane lipoprotein                                        |             |       | 2.0-  |



| Locus_tag   | Predicted function                                                                | Fold change |       |       |
|-------------|-----------------------------------------------------------------------------------|-------------|-------|-------|
|             |                                                                                   | BGPG2       | BGPG3 | BGPG4 |
| BGL_2c26570 | putative sugar transporter, major facilitator superfamily (MFS-1) transporter     |             | 2.5+  | 3.6+  |
| BGL_2c26610 | putative membrane protein                                                         |             |       | 2.3-  |
| BGL_2c26760 | hypothetical protein                                                              |             | 3.0+  | 2.8+  |
| BGL_2c26870 | hypothetical protein                                                              |             | 2.0+  | 2.5+  |
| BGL_2c26920 | hypothetical protein                                                              |             | 3.1+  | 2.2+  |
| BGL_2c27190 | hypothetical protein                                                              | 3.4-        |       |       |
| BGL_2c27200 | putative glutathione-dependent formaldehyde-activating enzyme, GFA                | 3.1-        |       |       |
| BGL_2c27210 | putative membrane protein                                                         | 2.4-        |       |       |
| BGL_2c27220 | transcriptional regulator, LysR family                                            | 2.1-        |       |       |
| BGL_2c27580 | arginine biosynthesis bifunctional protein ArgJ                                   | 2.5-        |       |       |
| BGL_2c27610 | putative enoyl-CoA hydratase                                                      | 4.4-        |       |       |
| BGL_2c27620 | putative asparagine synthase (glutamine-hydrolyzing)                              | 4.2-        |       |       |
| BGL_2c27630 | glutamate 5-kinase                                                                | 4.0-        |       |       |
| BGL_2c27640 | putative transcriptional regulator, LuxR family                                   | 41.5-       |       |       |
| BGL_2c27760 | putative methyl-accepting chemotaxis sensory transducer                           |             | 2.5+  | 2.3+  |
| BGL_2c27900 | 5-oxoprolinase (ATP-hydrolyzing)                                                  | 3.8+        |       |       |
| BGL_2c27990 | putative gluconolactonase                                                         |             |       | 2.4+  |
| BGL_2c28040 | hypothetical protein                                                              |             | 2.5+  | 2.3+  |
| BGL_2c28120 | putative natural resistance-associated macrophage protein                         |             |       | 3.7+  |
| BGL_2c28180 | putative lysine-arginine-ornithine-binding periplasmic protein                    | 2.5+        |       |       |
| BGL_2c28530 | phenylacetic acid degradation-like protein                                        | 2.3-        |       |       |
| BGL_2c28540 | putative alpha-methylacyl-CoA racemase                                            |             |       | 2.7-  |
| BGL_2c28550 | putative AcnD-accessory protein PrpF                                              |             |       | 2.4-  |
| BGL_2c28560 | Fe/S-dependent 2-methylisocitrate dehydratase AcnD family                         |             |       | 2.5-  |
| BGL_2c28610 | putative diguanylate cyclase/phosphodiesterase with PAS sensor                    | 2.4-        |       |       |
| BGL_2c28620 | hypothetical protein                                                              | 4.5-        |       |       |
| BGL_2c28640 | transcriptional regulator, IclR family                                            | 2.1-        |       |       |
| BGL_2c28730 | outer membrane porin, OprD family                                                 |             | 2.4-  | 2.5-  |
| BGL_2c28750 | amino acid/peptide transporter family                                             |             | 2.0-  | 2.5-  |
| BGL_2c28900 | hypothetical protein                                                              | 153.8-      |       |       |
| BGL_2c28920 | hypothetical protein                                                              | 2.6+        | 2.0-  |       |
| BGL_2c28930 | carbon starvation protein CstA                                                    | 2.5+        |       |       |
| BGL_2c28940 | hypothetical protein                                                              | 2.2+        |       | 2.0-  |
| BGL_2c28960 | porin Gram-negative type                                                          |             |       | 2.1-  |
| BGL_2c29020 | coenzyme PQQ synthesis protein C                                                  |             |       | 2.1-  |
| BGL_2c29030 | coenzyme PQQ synthesis protein B                                                  |             |       | 2.1-  |
| BGL_2c29440 | putative membrane protein                                                         |             | 2.0-  | 2.7-  |
| BGL_2c29450 | aminotransferase class-III                                                        | 2.6-        | 3.1-  | 4.7-  |
| BGL_2c29460 | putative peptidase C45, acyl-coenzyme A 6-aminopenicillanic acid acyl-transferase | 2.0-        | 2.4-  | 2.3-  |

7

8

9

10

## SUPPLEMENTARY FIGURES

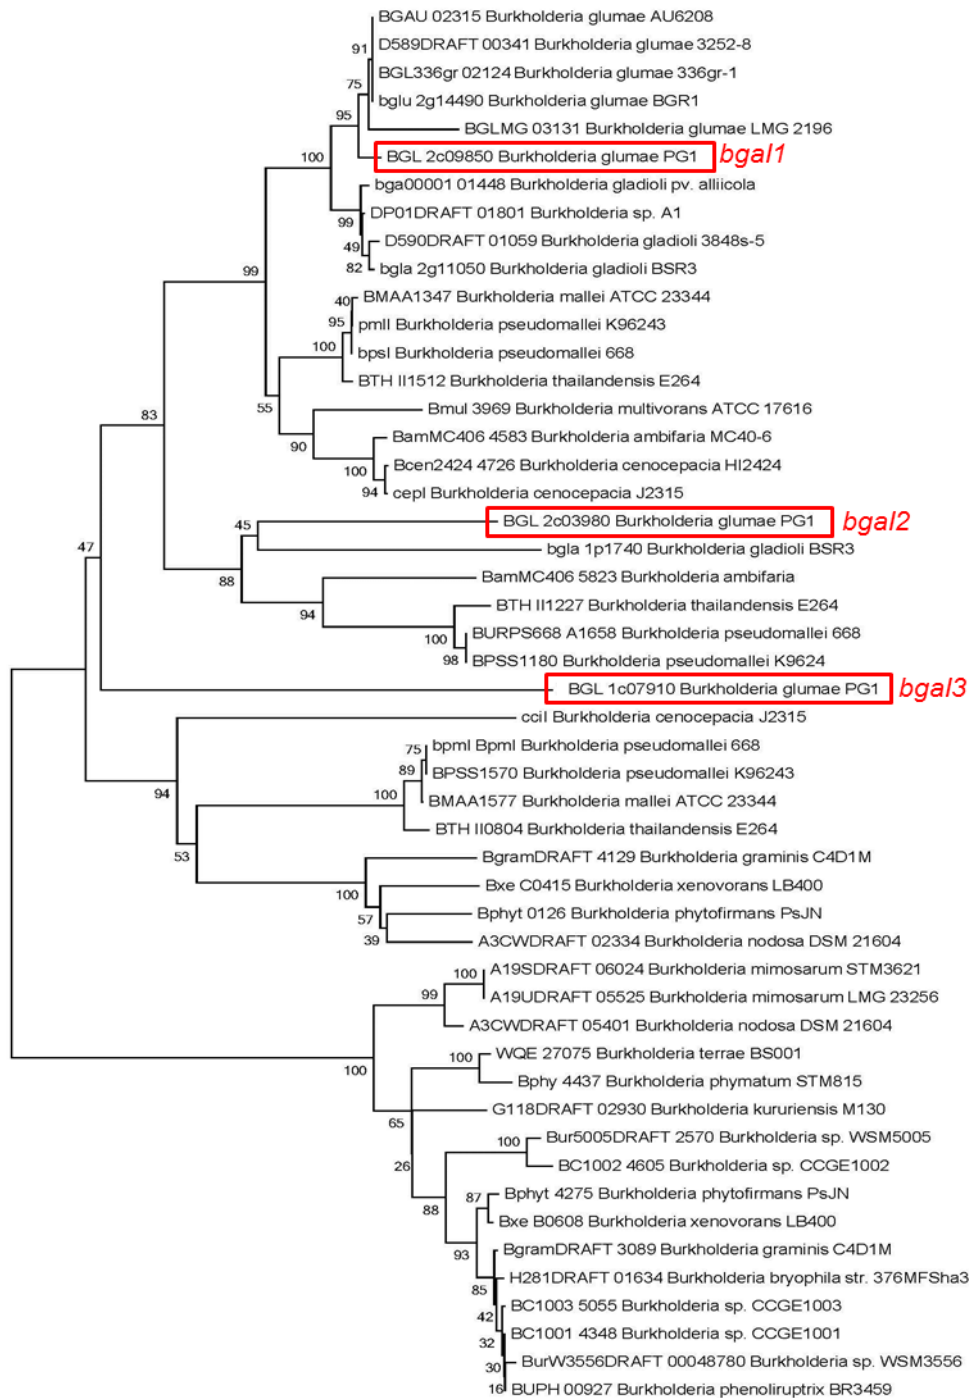

11

12 **Figure S1.** Phylogenetic analyses of AHL synthases between *B. glumae* PG1 and the  
 13 selected *Burkholderia* strains based on amino acid sequences. The genetic tree was  
 14 established using neighbor-joining method with the MUSCLE program in the MEGA  
 15 software package, the percentage of bootstrap resamplings is indicated at the different  
 16 nodes.

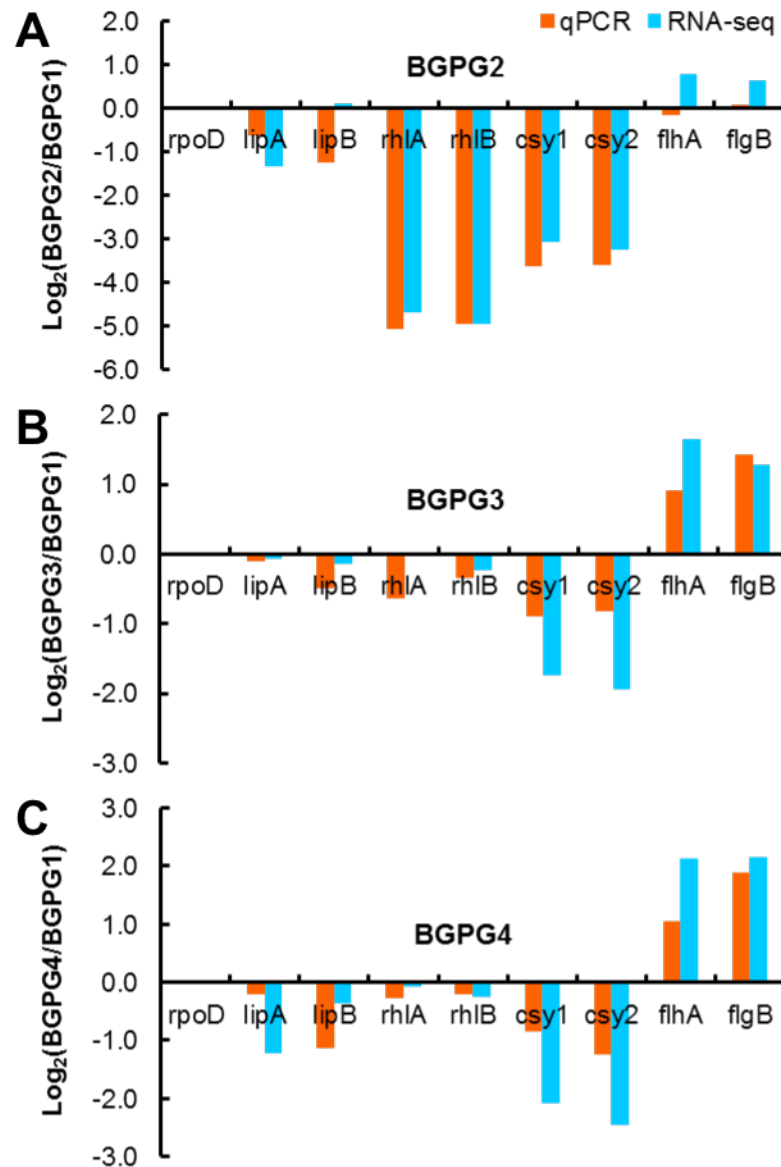

17

18 **Figure S2.** Validation of RNA-seq data by quantitative RT-PCR in the transition from  
 19 exponential to stationary growth phase. **(A)** Fold change differences of BGPG2 to  
 20 BGPG1. **(B)** Fold change differences of BGPG3 to BGPG1. **(C)** Fold change differences  
 21 of BGPG4 to BGPG1. Orange bars indicate the fold change differences from qRT-PCR;  
 22 blue bars indicate the fold change differences from RNA-seq analyses. The *rhlA* and *rhlB*  
 23 (BGL\_2c07470-80) are involved in rhamnolipid biosynthesis, the *csy1* and *csy2* genes  
 24 (BGL\_1c18830-40) are part of a CrispR/CAS system and the *flhA1* (BGL\_1c01710) and  
 25 *flgB* (BGL\_1c35020) genes are involved in the built up of the bacterial flagella.

26

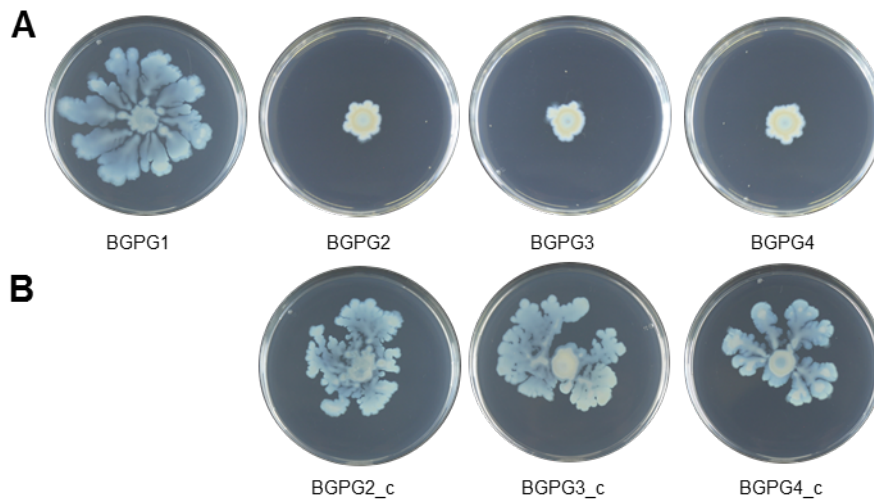

27

28 **Figure S3.** Complementation of the swarming phenotype of the three AHL synthase  
29 mutants. **(A)** Reduced swarming phenotypes of BGPG2, BGPG3, and BGPG4  
30 compared to wild-type BGPG1 on agar plates containing 0.45% Eiken agar. Plates were  
31 inoculated with  $1 \times 10^7$  cells and incubated for 3 days at 28°C. **(B)** Complemented strains  
32 of BGPG2-4 designated BGPG2\_c, BGPG3\_c, BGPG4\_c and expressing *bga1-3*,  
33 respectively, in *trans* on the plasmid pBBR1MCS-2 could restore the swarming  
34 phenotype. Therefore,  $1 \times 10^7$  cells were inoculated on swarming agar plates containing  
35 0.45% Eiken and were incubated for 3 days at 28°C.

36

37

38

39

40

41

42

43

44

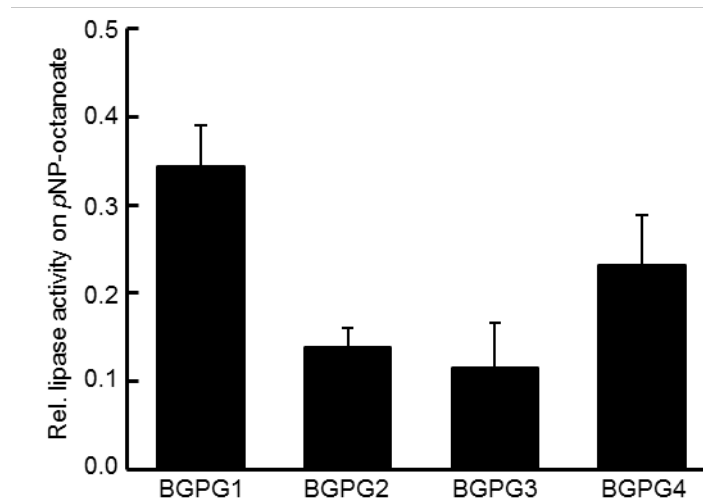

45

46 **Figure S4.** Relative lipolytic activities measured in cell supernatants of *B. glumae* using  
47 pNP-octanoate (C8, 0.1 mM) as a substrate according to the previously described  
48 method with little modification (1). Tests were performed by incubating 40  $\mu$ l of  
49 supernatant with 25  $\mu$ l of 1 mM octanoate and 435  $\mu$ l of 0.1 M phosphate buffer (pH 8.0)  
50 at 37°C for up to 20 min. Solution was centrifuged at 13,000 rpm and 2°C for 5 min after  
51 adding 1 ml ethanol. Extinction of the supernatant was measured at 405 nm. The  
52 relative lipase activity was calculated as the ratio of  $OD_{405}/OD_{600}$ . Data are mean values  
53 of at least three measurements. Bars indicate the standard deviations. Cell  
54 supernatants were collected from 26 hour-old stationary phase cells.

55

56

57

58

59

60

61

62

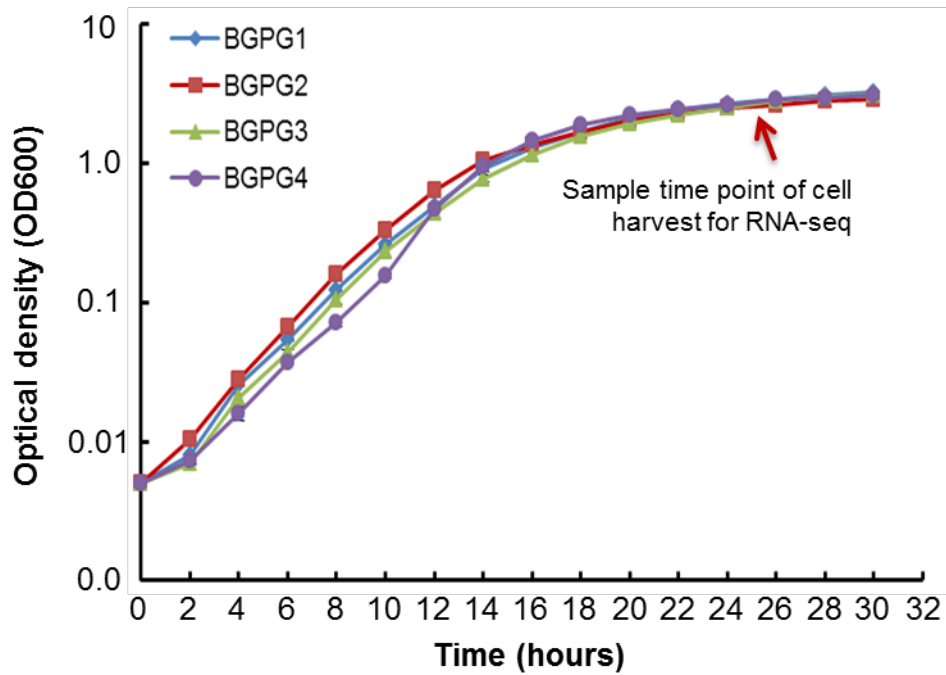

63

64 **Figure S5.** Growth curve of wild-type strain BGPG1 and three AHL synthase mutants  
65 BGPG2-4 over a period of 30 h (semi-log plot). The sampling point of the twelve  
66 transcriptome samples is indicated with a red arrow.

67

68

69

70

71

72

73

74

75

76

77

78

79

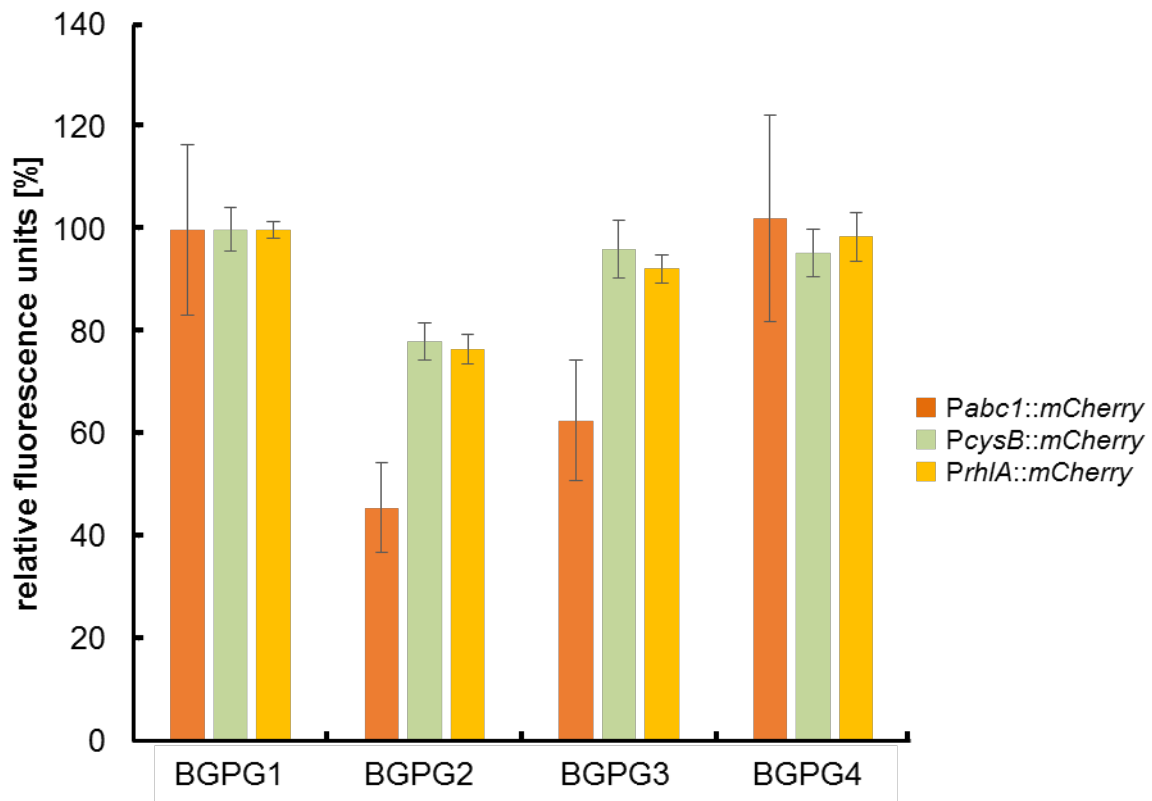

80

81 **Figure S6.** Relative fluorescence of BGPG1 and the QS mutants BGPG2-4 carrying the  
 82 *Pabc1::mCherry*; *PcysB::mCherry*; and *PrhIA::mCherry* promoter fusions in the vector  
 83 pBBR1MCS-2. Data indicate the relative expression of the respective promoter fusions  
 84 in BGPG2-4 mutants vs. the wild-type BGPG1. Samples were grown at 30°C for 48 h.  
 85 Data are mean values from at least three independent cultures. Bars indicate the simple  
 86 standard deviations and are a result of three measurements.

87

88

89

90

91

92

93

94

95

## SUPPLEMENTARY REFERENCES

96

97

1. **Nawani N, Khurana J, Kaur J.** 2006. A thermostable lipolytic enzyme from a thermophilic *Bacillus sp.*: purification and characterization. *Mol. Cell. Biochem.* **290**:17-22.

98

99
